# Supplementary material for: A frog cathelicidin peptide effectively promotes cutaneous wound healing in mice
Source: PubMed Central journal article supplement — Biochem J. 2018 Sep 11;475(17):2785–99. doi: 10.1042/BCJ20180286 (PMC6134359; doi:10.1042/bcj20180286), 2018-09-11
Supplement: BCJ-475-2785-s1.pdf [file BCJ-475-2785-s1.pdf]

**Fig. S1** MALDI-TOF mass spectrometry analysis of cathelicidin-NV

**Fig. S2** Multi-sequence alignment of cathelicidin-NV precursor with other amphibian cathelicidins. The symbols under the alignment indicate the following: *asterisk* identical sites; *colon* conserved sites; *dot* less conserved sites. *Dashes* are inserted to optimize the alignment. The two conserved cysteine residues involved in disulfide bridges are *gray shaded*.

**Fig. S3** The activity on the motility and proliferation of keratinocytes and fibroblasts of the scrambled version of cathelicidin-NV (sNV) and sCathelicidin-NV. Cultured keratinocytes (A) and fibroblasts (B) were treated with vehicle (Control), sNV and sCathelicidin-NV with indicated concentration and relative cell numbers were estimated by O.D readings. Values are the mean  $\pm$  SEM ( $n = 5$ ). \*,  $P < 0.05$ ; \*\*,  $p < 0.01$  compared with control; ##,  $p < 0.01$  compared with sNV.

**Table S1** Primer sequences used for cloning in this study

**Table S2** Antimicrobial activity of cathelicidin-NV

The results were calculated from three independent experiments in duplicates. ND, no detectable antimicrobial activity of cathelicidin-NV at concentration up to 200  $\mu\text{g/ml}$ . MIC, minimal inhibitory concentration.

**Fig. S1**

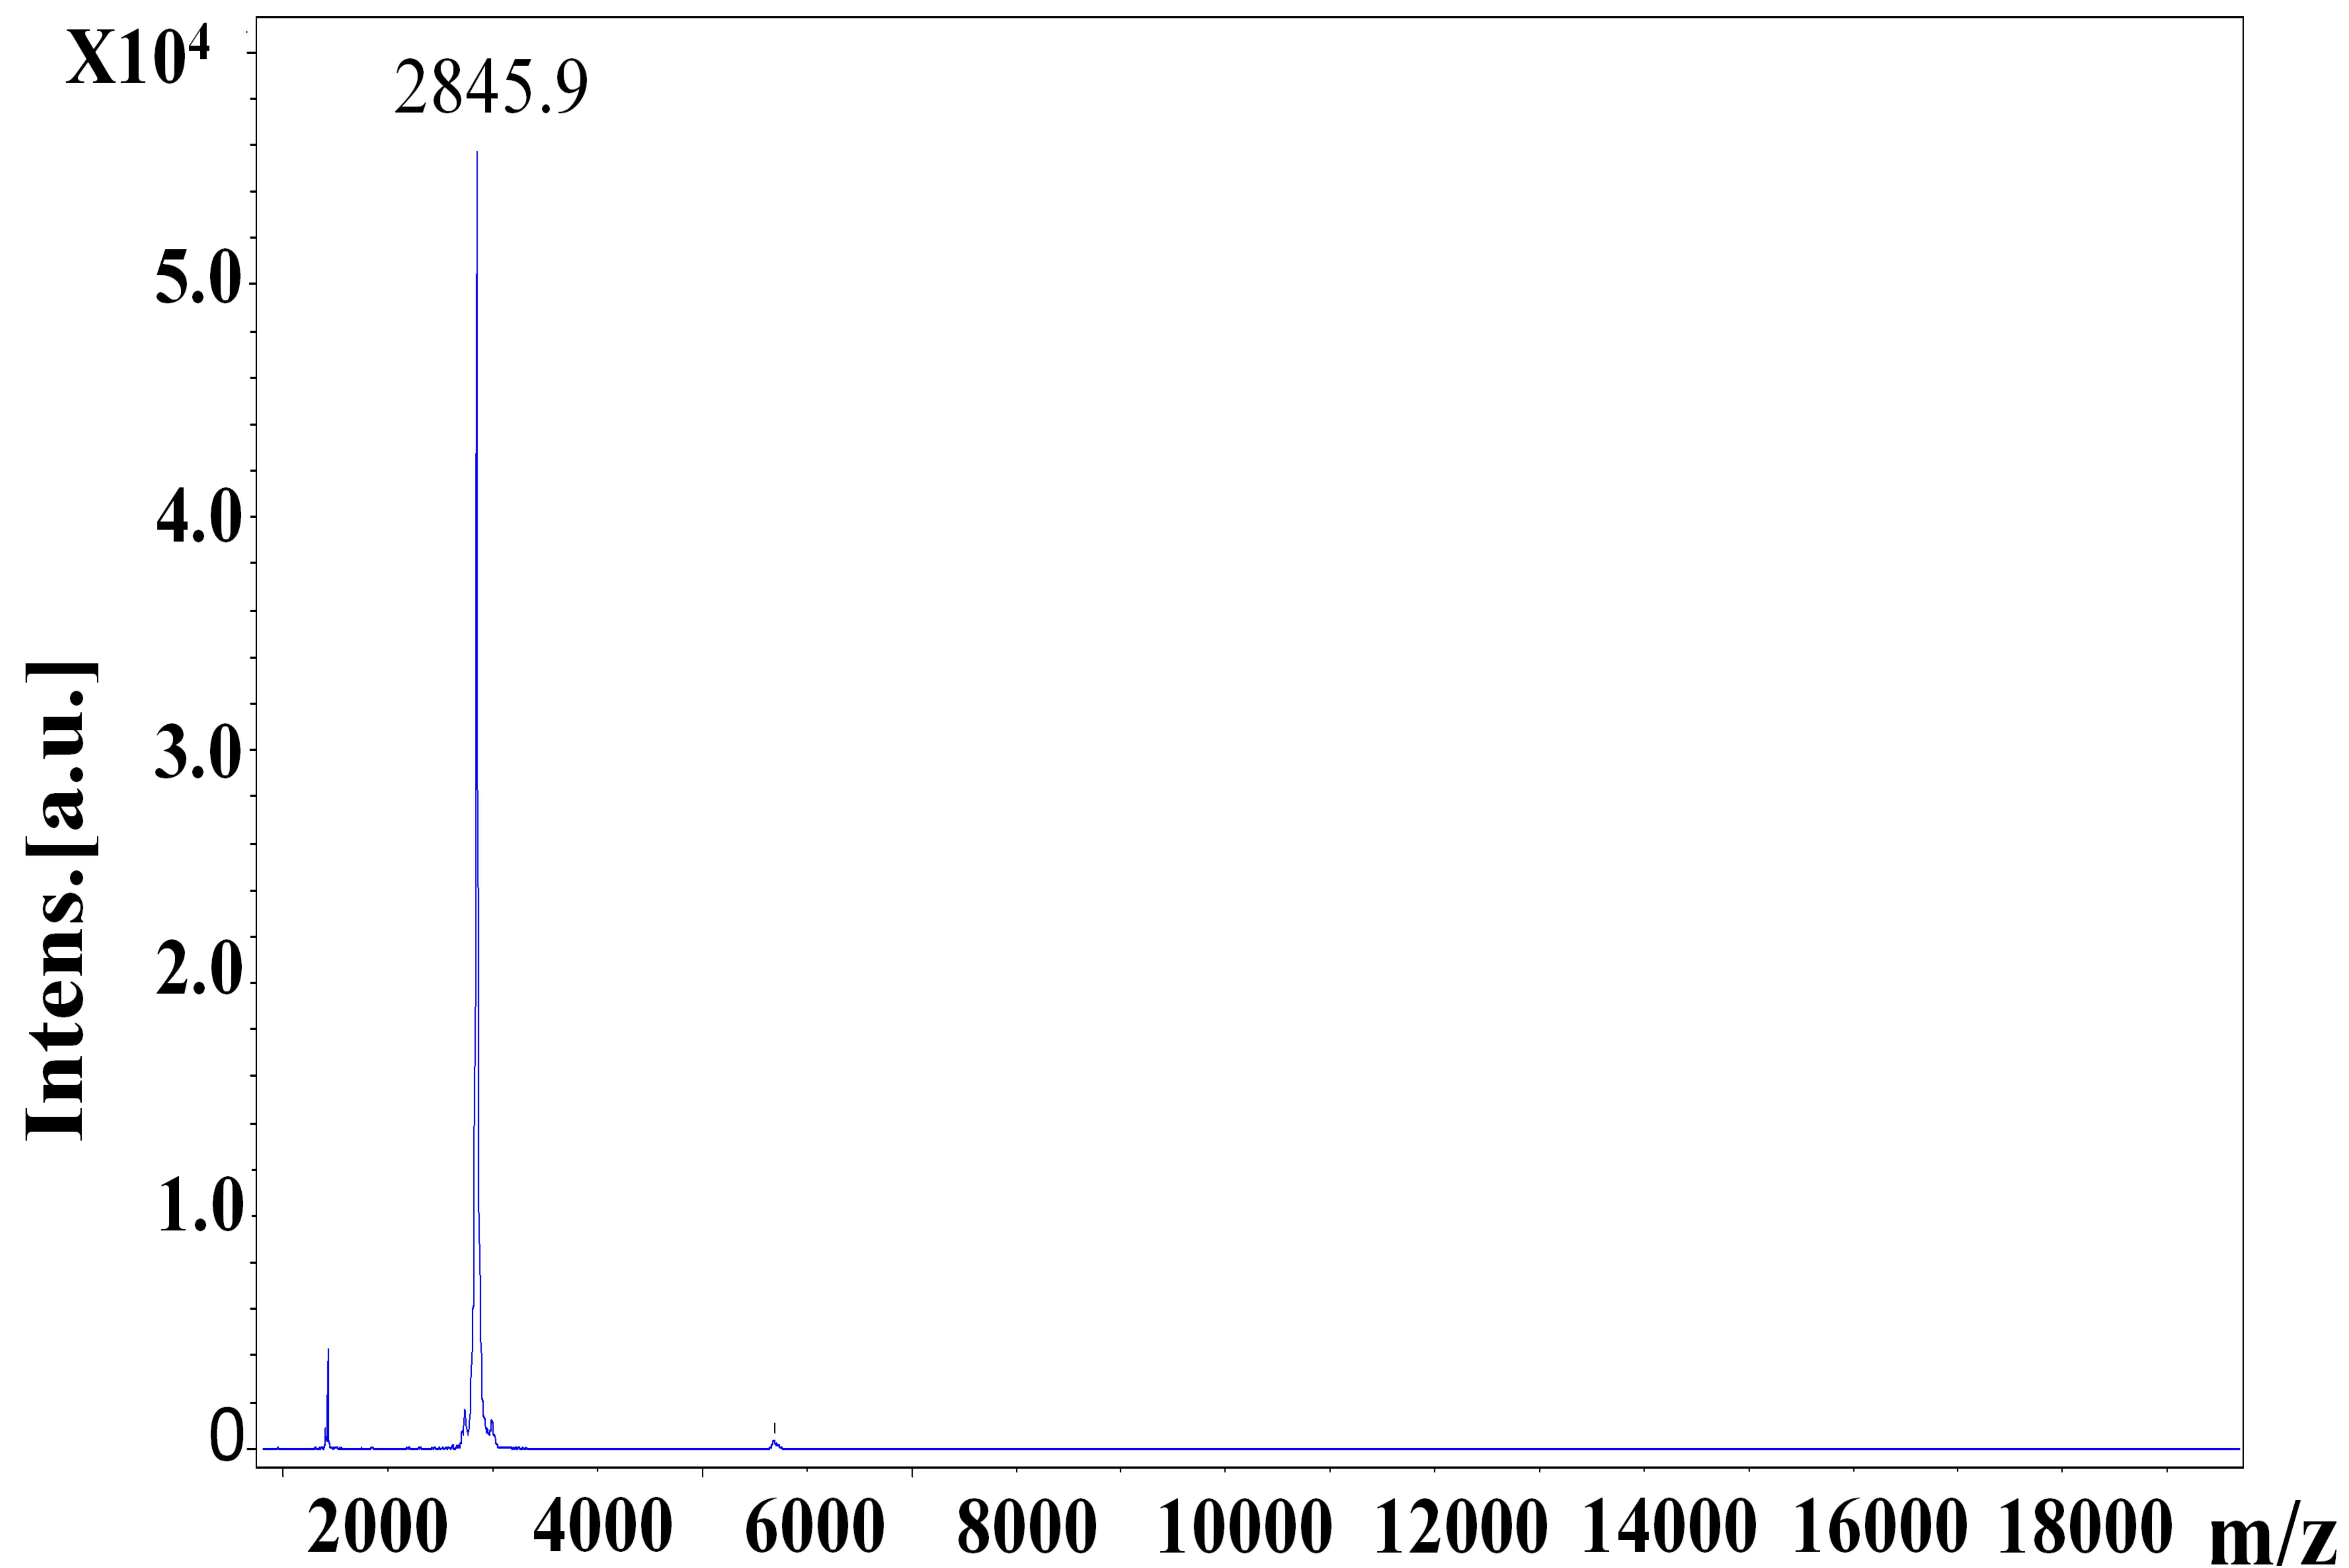

# Fig.S2

Frog:Cathelicidin-NV MKVWQCALWIS-ALTWQAARSQSPDREE----WIREALDLYNQREDGEGFFFKFLSDLPAA  
 Frog:Cath-2-like-isoform X1 MKVWQCALWIS-ALTLQAARSQSPDREE----WIREALDLYNQREDGEGFFFKFLSDLPAA  
 Frog:Cath-2-like isoform X2 MKVWQCALWIS-ALTLQAARSQSPDREE----WIKEALDLYNQREDGEGFFFKFLSDLPAA  
 Frog:Na\_CRAMP-like peptide MKVWQCALWIS-ALTLQAARSQSPDREE----WIKEALDLYNQREDGEGFFFKFLSDLPAA  
 Frog:Lf-CATH1 MKIWQCWLWLS---AVTLARSQFLDQDG----WIREALDLYNQREDGEYFFKVLSDVPAD  
 Frog:Lf-CATH2 MKIWQCWLWLS---TVTWARSPDQDG----WVREALDLYNQREDGEFYFKLLSDLPAA  
 Toad:Cathelicidin-DM MRSWRLSLLLVS AVTLHGCLSDPAEPEVQDGRSIEDVIDLYNQREGVTYLYKSLDQLPPV  
 \*: \*: \* : : . \*: : : : : :\*\*\*\*\*. : :\* \*.:\*.

Frog:Cathelicidin-NV PLEEE-NNPTISFLIKETECLKSEDINLEECDYKKDGEVKVCGLYPEEGETMKTCLKVSL  
 Frog:Cath-2-like-isoform X1 PLEEEGSPAIGFLIKETDCPKSEDCDLEKRDRYKDGGEVKVCALYREE----EDVKCVSL  
 Frog:Cath-2-like isoform X2 PLEEEGSPAIGFLIKETDCPKSEDCDLEKRDRYKDGGEVKVCALYREE----EDVKCVSL  
 Frog\_Na\_CRAMP-like peptide PLEEE-NNPTIAFLIKETECLKSEDINLEECDYKKDGEVKVCGLYPAEGETMKTCLKVGL  
 Frog:Lf-CATH1 LLQE-GESPEVAFLIKETECLKSEDNELARCDYKNDGEVKACGLYLEEGEASGTLKCVSL  
 Frog:Lf-CATH2 LLQEEGSPAIGFLIKETECLKSEAGDPEQCDYRQDGEVKVCALYREE----EEVKCVSL  
 Toad:Cathelicidin-DM PMEEDENPNRRGFIMKETVCLKSENPDLTQCDFKPDGDVKICSLDLGD-EDPEDIMCFSL  
 ::\* : .\*:\* \*\* \* \*\* : . \*:\* \*\*:\* \*.\* : : \*.\*

Frog:Cathelicidin-NV TKFHT-KRARGKKECKDDRCRLLMKRGSFYSYV-----146 aa [*Nanorana ventripunctata*]  
 Frog:Cath-2-like-isoform X1 SKDSRTRRSGTKRNCNFLCKVKQRLRSASSTSHIGMAIPRPRG----154. aa [*Nanorana parker*]  
 Frog:Cath-2-like isoform X2 SKDSRTRRSGTKRNCNFLCKVKQRLRSASSTSHIGMAIPRPRG----154. aa [*Nanorana parker*]  
 Frog\_Na\_CRAMP-like peptide TKANGKAESAVKIVKNVCKKAQSDGKDQWKAILQWRNTPTVGMDSSC161 aa [*Nanorana parker*]  
 Frog:Lf-CATH1 TKNPRMKPANRRPPCRGIFCRRVGSSSAIARPGKTLSTFITV-----155 aa [*Limnonectes fragilis*]  
 Frog:Lf-CATH2 TENSRIIRANKKGGKCNVLCQLKQKLRSIGSGSHIGSVLPRG----151 aa [*Limnonectes fragilis*]  
 Toad:Cathelicidin-DM NKEVRMKRSSRRKPCKGWLCKLKLRRGGYTLIGSATNLNRPTYVRA---164 aa [*Duttaphrynus melactus*]  
 .:

**Fig.S3**

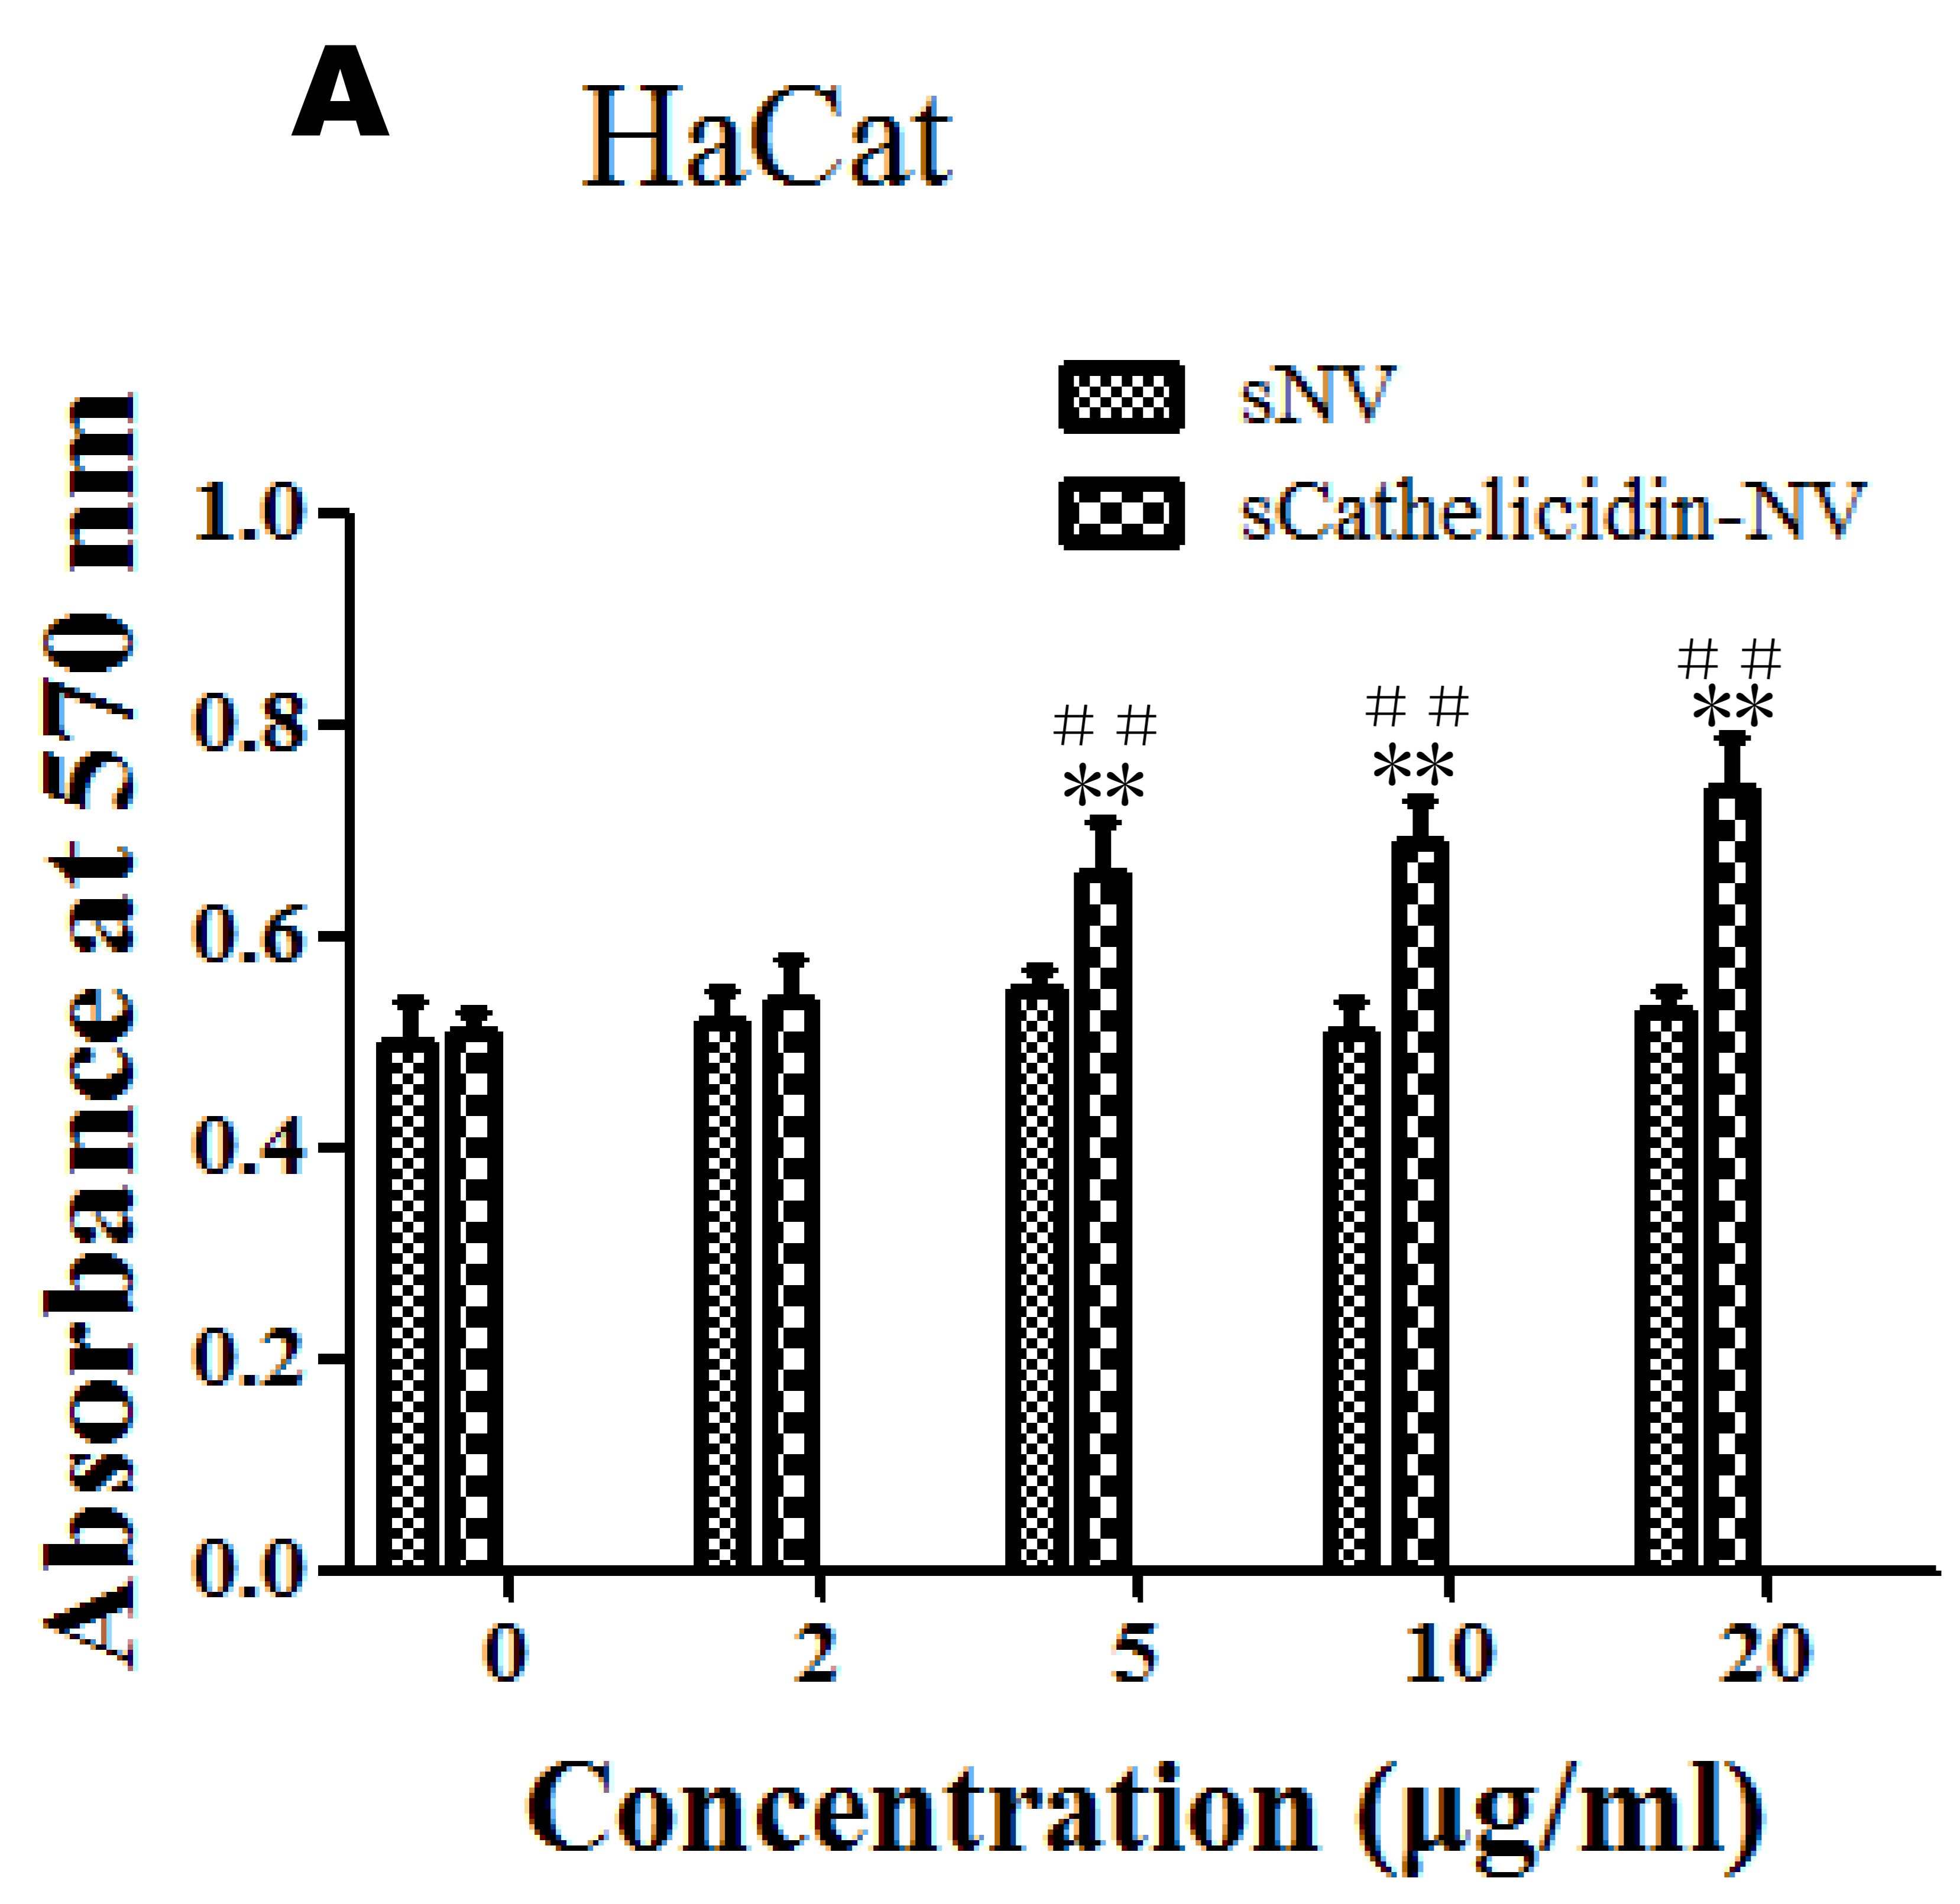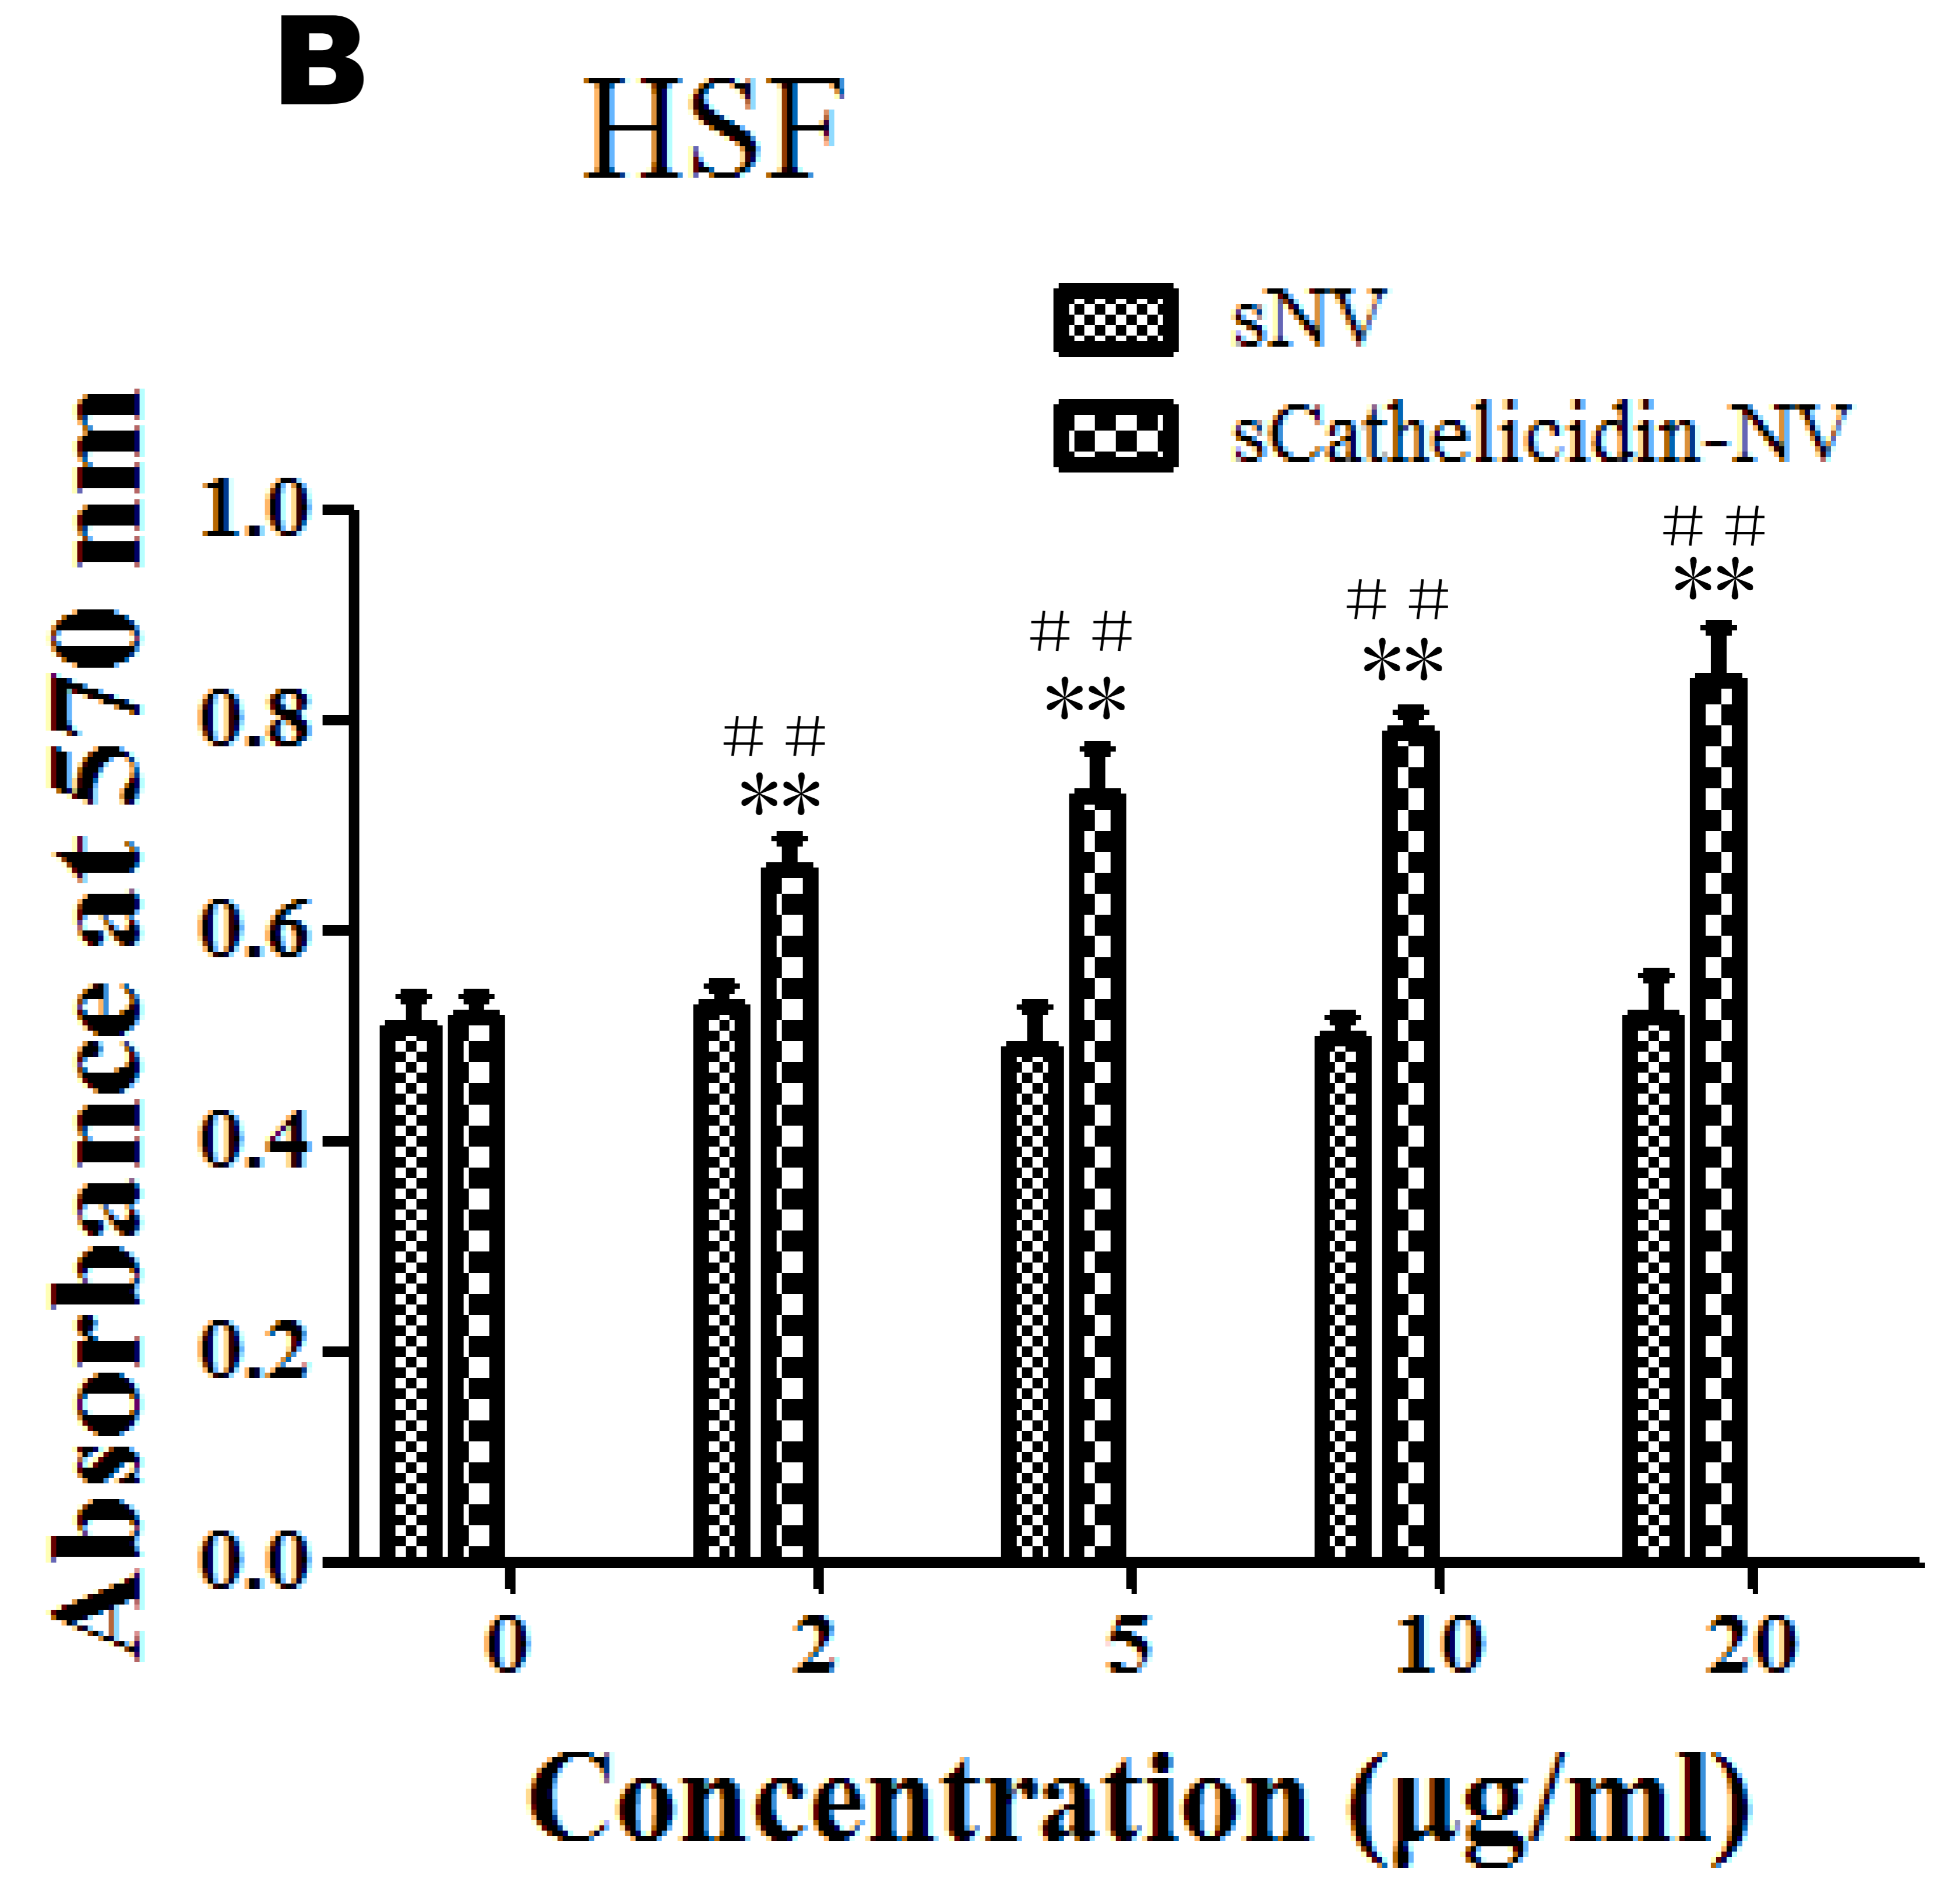

**Table S1.** Primer sequences used for cloning in this study

| <b>Primer</b>                  | <b>Sequence (5'→3')</b>   | <b>application</b> |
|--------------------------------|---------------------------|--------------------|
| Cathelicidin-NV-R <sub>1</sub> | CYTTRCAYTCYTTYTTNCC*      | 5' end screening   |
| 5' PCR primer                  | AAGCAGTGGTATCAACGCAGAGT   | 5' end screening   |
| Cathelicidin-NV-F <sub>1</sub> | ATGAAGGTCTGGCAGTGTGCGCTAT | 3' end screening   |
| 3' PCR primer                  | CGGGGTACGATGAGACACCA      | 3' end screening   |

\*Where Y stands for C or T; R stands for A or G; N stands for A, C, G or T.

**Table S2.** Antimicrobial activity of cathelicidin-NV

| <b>Microorganisms</b>                         | <b>MIC (<math>\mu\text{g/ml}</math>)</b> |
|-----------------------------------------------|------------------------------------------|
| <b>Gram-positive bacteria</b>                 |                                          |
| <i>Staphylococcus aureus</i> ATCC2592         | ND                                       |
| <i>Staphylococcus haemolyticus</i> ATCC 29970 | ND                                       |
| <i>Staphylococcus epidermidis</i> ATCC 12228  | ND                                       |
| <i>Streptococcus pyogenes</i> ATCC19615       | ND                                       |
| <i>Bacillus subtilis subtilis</i> ATCC 6633   | ND                                       |
| <i>Enterococcus faecalis</i> ATCC29212        | ND                                       |
| <i>Micrococcus luteus</i> ATCC 4698           | ND                                       |
| <b>Gram-negative bacteria</b>                 |                                          |
| <i>Escherichia coli</i> ATCC25922             | ND                                       |
| <i>Salmonella paratyphi</i> A ATCC 9150       | ND                                       |
| <i>Salmonella typhimurium</i> ATCC 14028      | ND                                       |
| <i>Pseudomonas aeruginosa</i> ATCC 27853      | ND                                       |
| <i>Acinetobacter junii</i> ATCC 17908         | ND                                       |
| <i>Acinetobacter baumannii</i> ATCC 17978     | ND                                       |
| <b>Fungi</b>                                  |                                          |
| <i>Candida albicans</i> ATCC 14053            | ND                                       |
| <i>Candida glabrata</i> ATCC 66032            | ND                                       |
